# Supplementary material for: Adaphostin-Induced Oxidative Stress in Oesophageal Neuroendocrine Carcinoma: A Potential Therapeutic Strategy
Source: Research Square preprint supplement (doi:10.21203/rs.3.rs-7314270/v1), 2025-10-12
Supplement: Supplementary file 1 [file aff01eec21b0855de80a88e5.docx]

**Adaphostin-Induced Oxidative Stress in Oesophageal Neuroendocrine Carcinoma: A Potential Therapeutic Strategy**

**Supplementary Material**

Table S1. Primary and secondary antibodies used for western blotting

| Antibody Type | Target | Host species | Dilution used* | Supplier and catalogue number |
| --- | --- | --- | --- | --- |
| Primary | Anti-DNA PKcs (phospho S2056) antibody [EPR5670] | Rabbit mAb | 1:2000* | Abcam #ab124918 |
| Anti-DNA PKcs antibody [Y393] | Rabbit mAb | 1:5000* | Abcam #ab32566 |
| Cleaved PARP (Asp214) | Rabbit | 1:2000 | Cell Signaling Technology #9541 |
| Phospho-Histone H2A.X (Ser139) | Mouse mAb | 1:1000* | Invitrogen **#14-9865-82** |
| GAPDH | Mouse mAb | 1:10,000* | Sigma #G8795 |
| Secondary | Goat Anti-Rabbit IgG, HRP-linked | Goat | 1:5000* | Cell Signaling Technology #7074 |
| Goat Anti-Mouse IgG HRP-linked | Goat | 1:5000* | Abcam #ab205719 |

* Diluted in 2% (w/v) skim milk powder in Tris-buffered saline solution


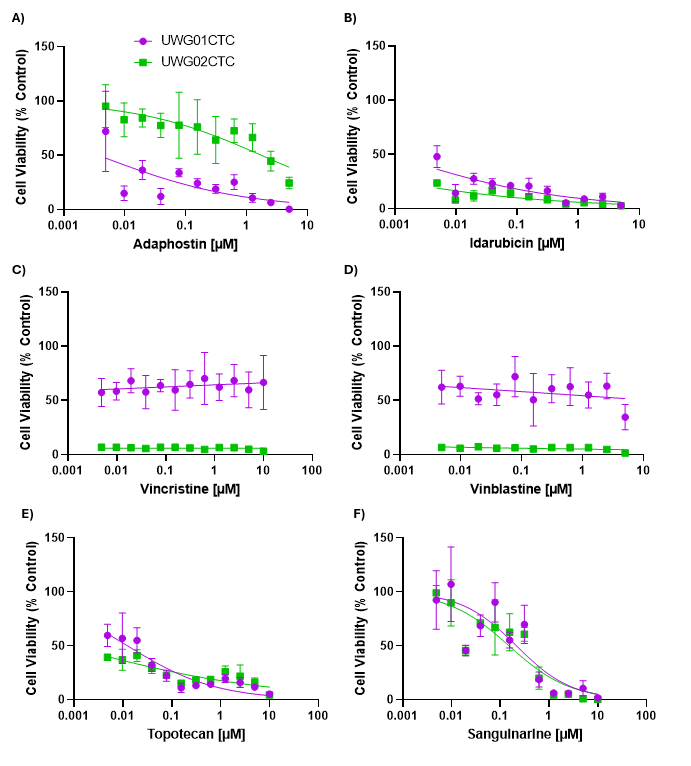


Figure S1. **Example top compound hits identified via the LOPAC1280 compound library under 21% O2 and 5% CO2 conditions**. Dose responsiveness of the UWG01CTC (purple) and UWG02CTC (green) lines towards treatment with **A)** adaphostin, **B)** idarubicin, **C)** vincristine, **D)** vinblastine, **E)** topotecan, and **F)** sanguinarine. Values shown are mean ± SEM, n= 3.


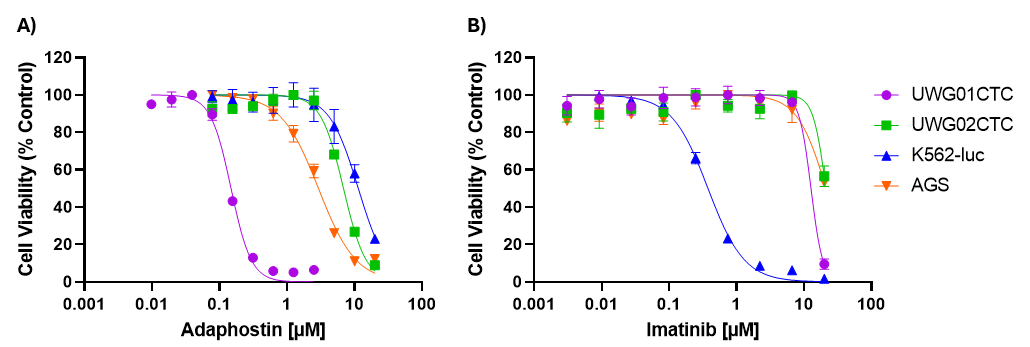


Figure S2. **Representative dose-response curves for UWG01CTC, UWG02CTC, AGS, and K562-luc cell lines treated with A) adaphostin and B) imatinib**. Values shown are mean ± SEM, n= 4.


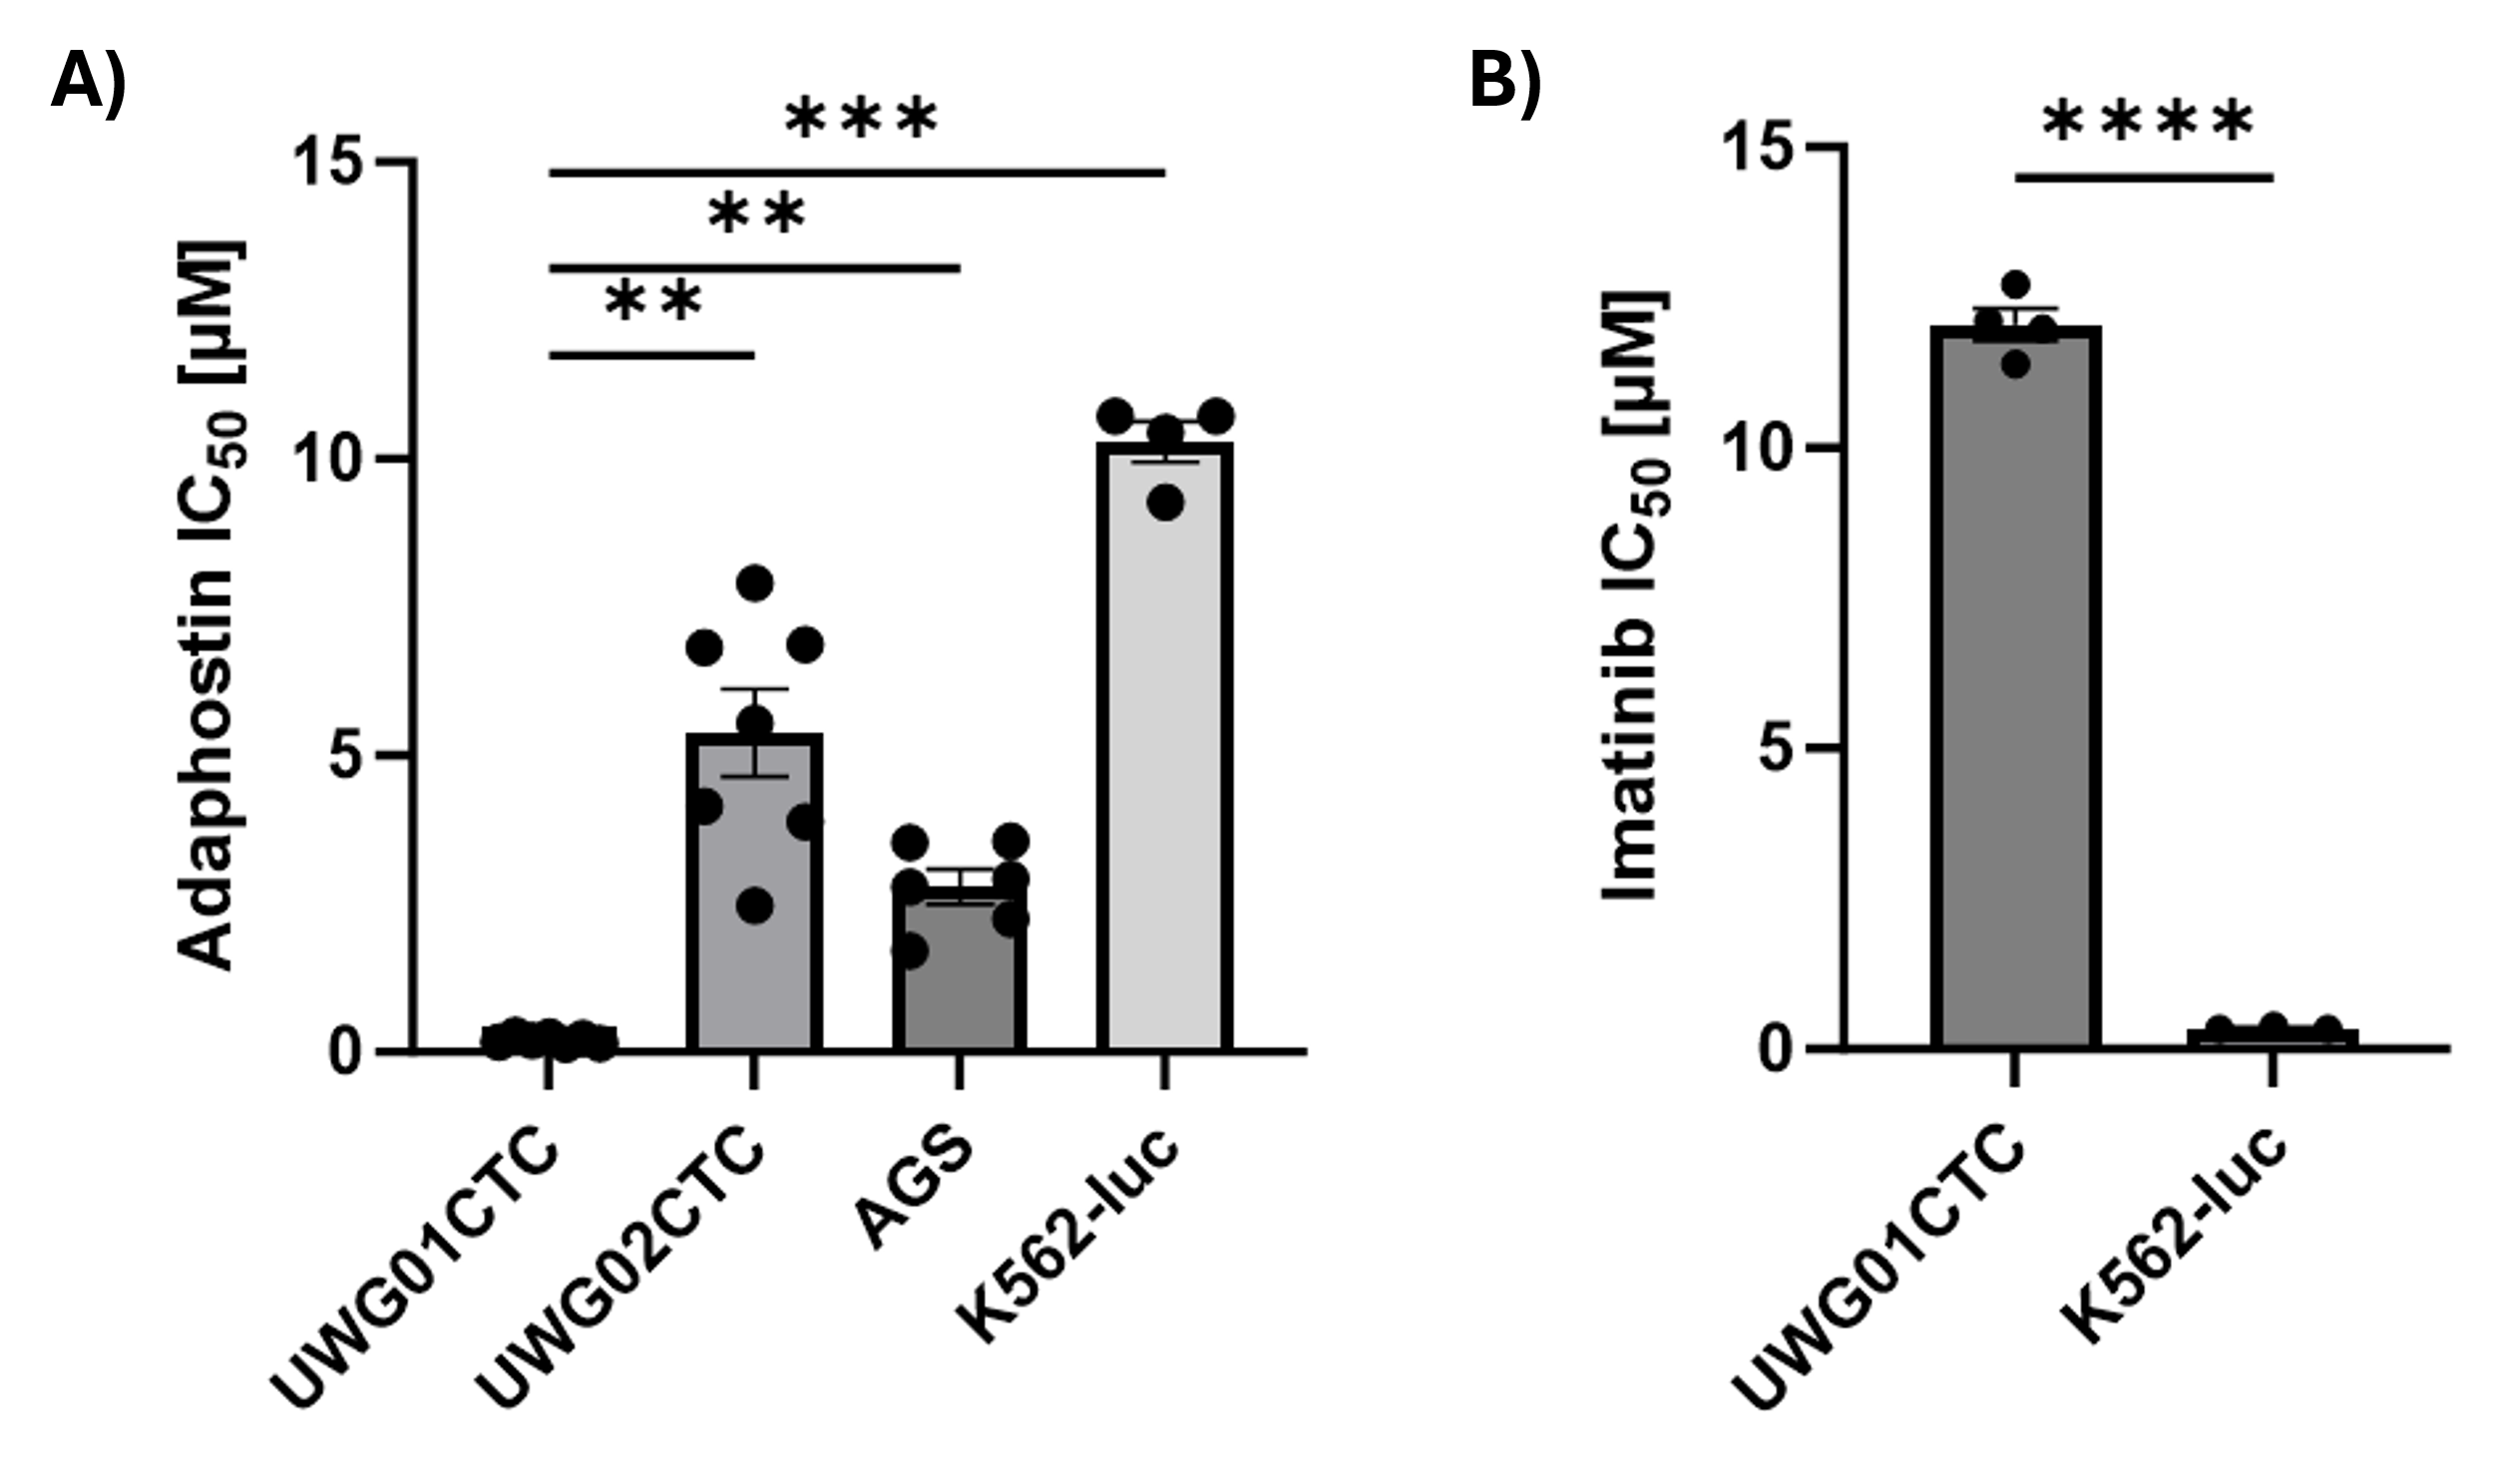


Figure S3. **Statistical analyses confirmed a significant difference in IC50 values between cell lines and the UWG01CTCs treated with adaphostin and imatinib. A)** Brown Forsythe and Welch’s ANOVA tests were performed to assess the significance between IC50 values obtained for the UWG01CTC, UWG02CTC, AGS, and K562-luc cell lines treated with adaphostin. The UWG01CTC IC50 value was significantly lower than the reported values of all the other cell lines, with UWG01CTC vs UWG02CTC P=0.0021, UWG01CTC vs AGS P=0.0016, and UWG01CTC vs K562-luc P=0.0003. **B)** An unpaired T test with Welch’s correction was used to assess the significance between the UWG01CTC and K562-luc cell lines treated with imatinib. The UWG01CTC IC50 value obtained was significantly higher than the value obtained for the K562-luc cell line, with P<0.0001.


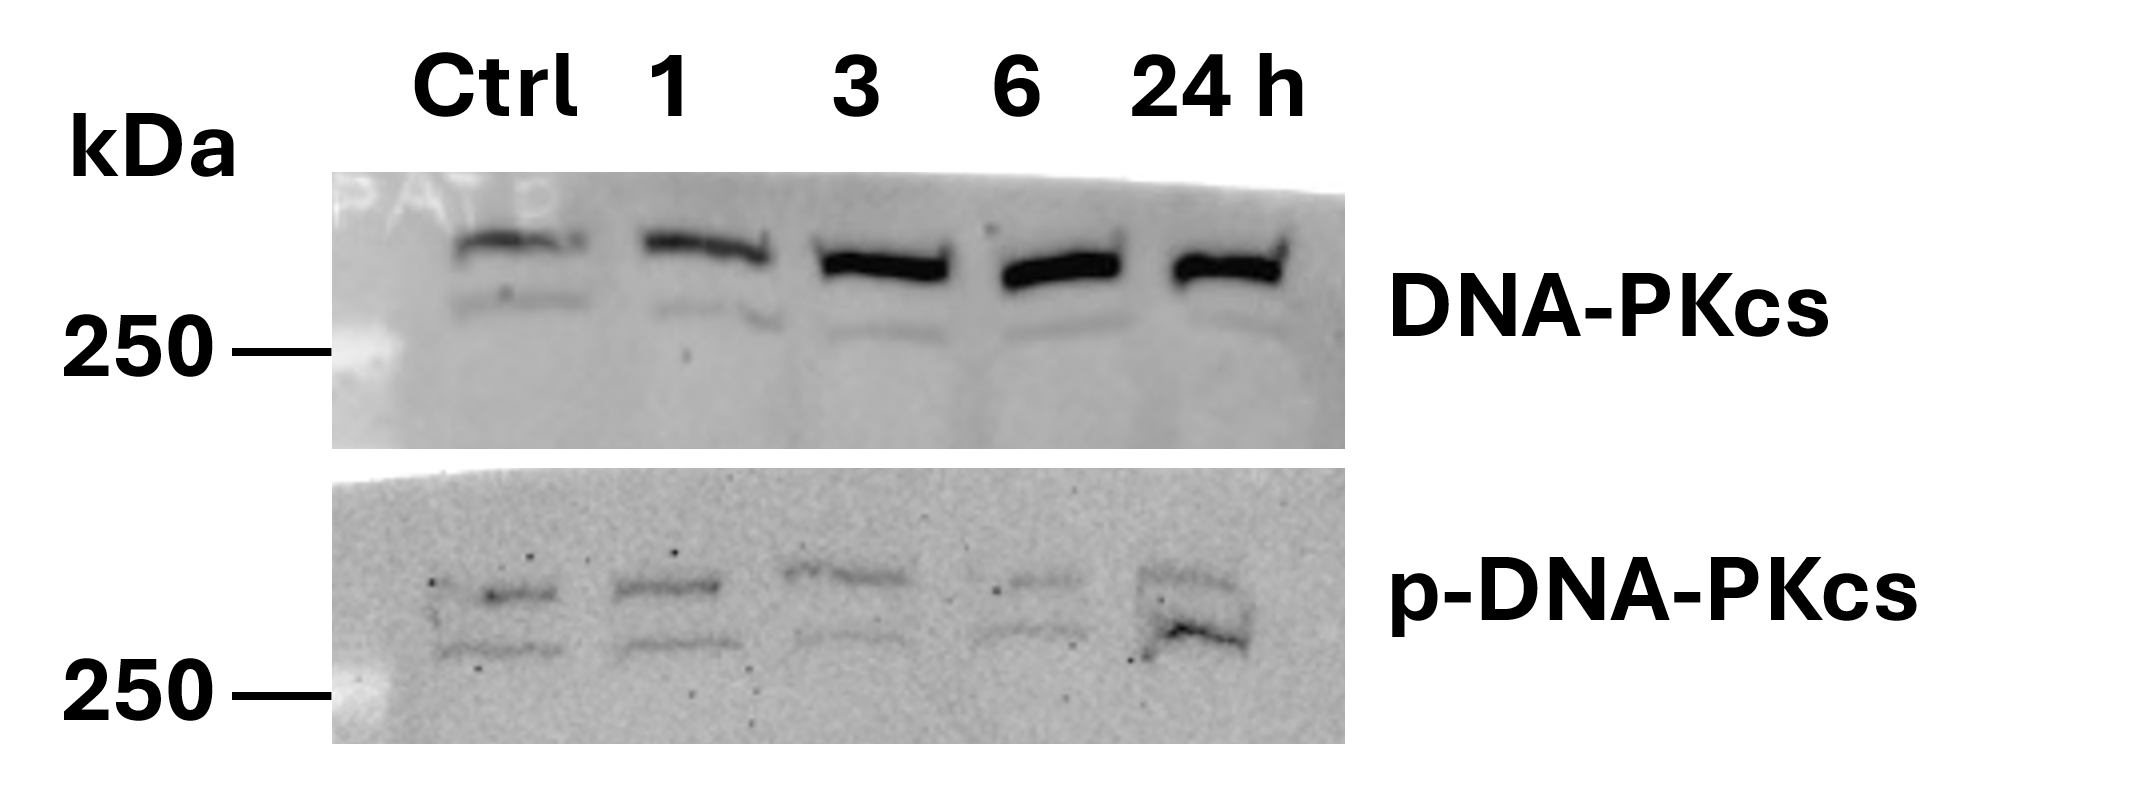


Figure S4. **Adaphostin induces DNA damage and apoptosis in UWG01CTCs observed via western blot analysis**. Representative western blotting images of UWG01CTCs treated with 0.5 µM adaphostin for 0, 1, 3, 6, and 24 h, depicting the expression of DNA-PKcs and p-DNA-PKcs. Uniform GAPDH expression for this experiment is shown in Figure 2B, confirming equal protein loading.


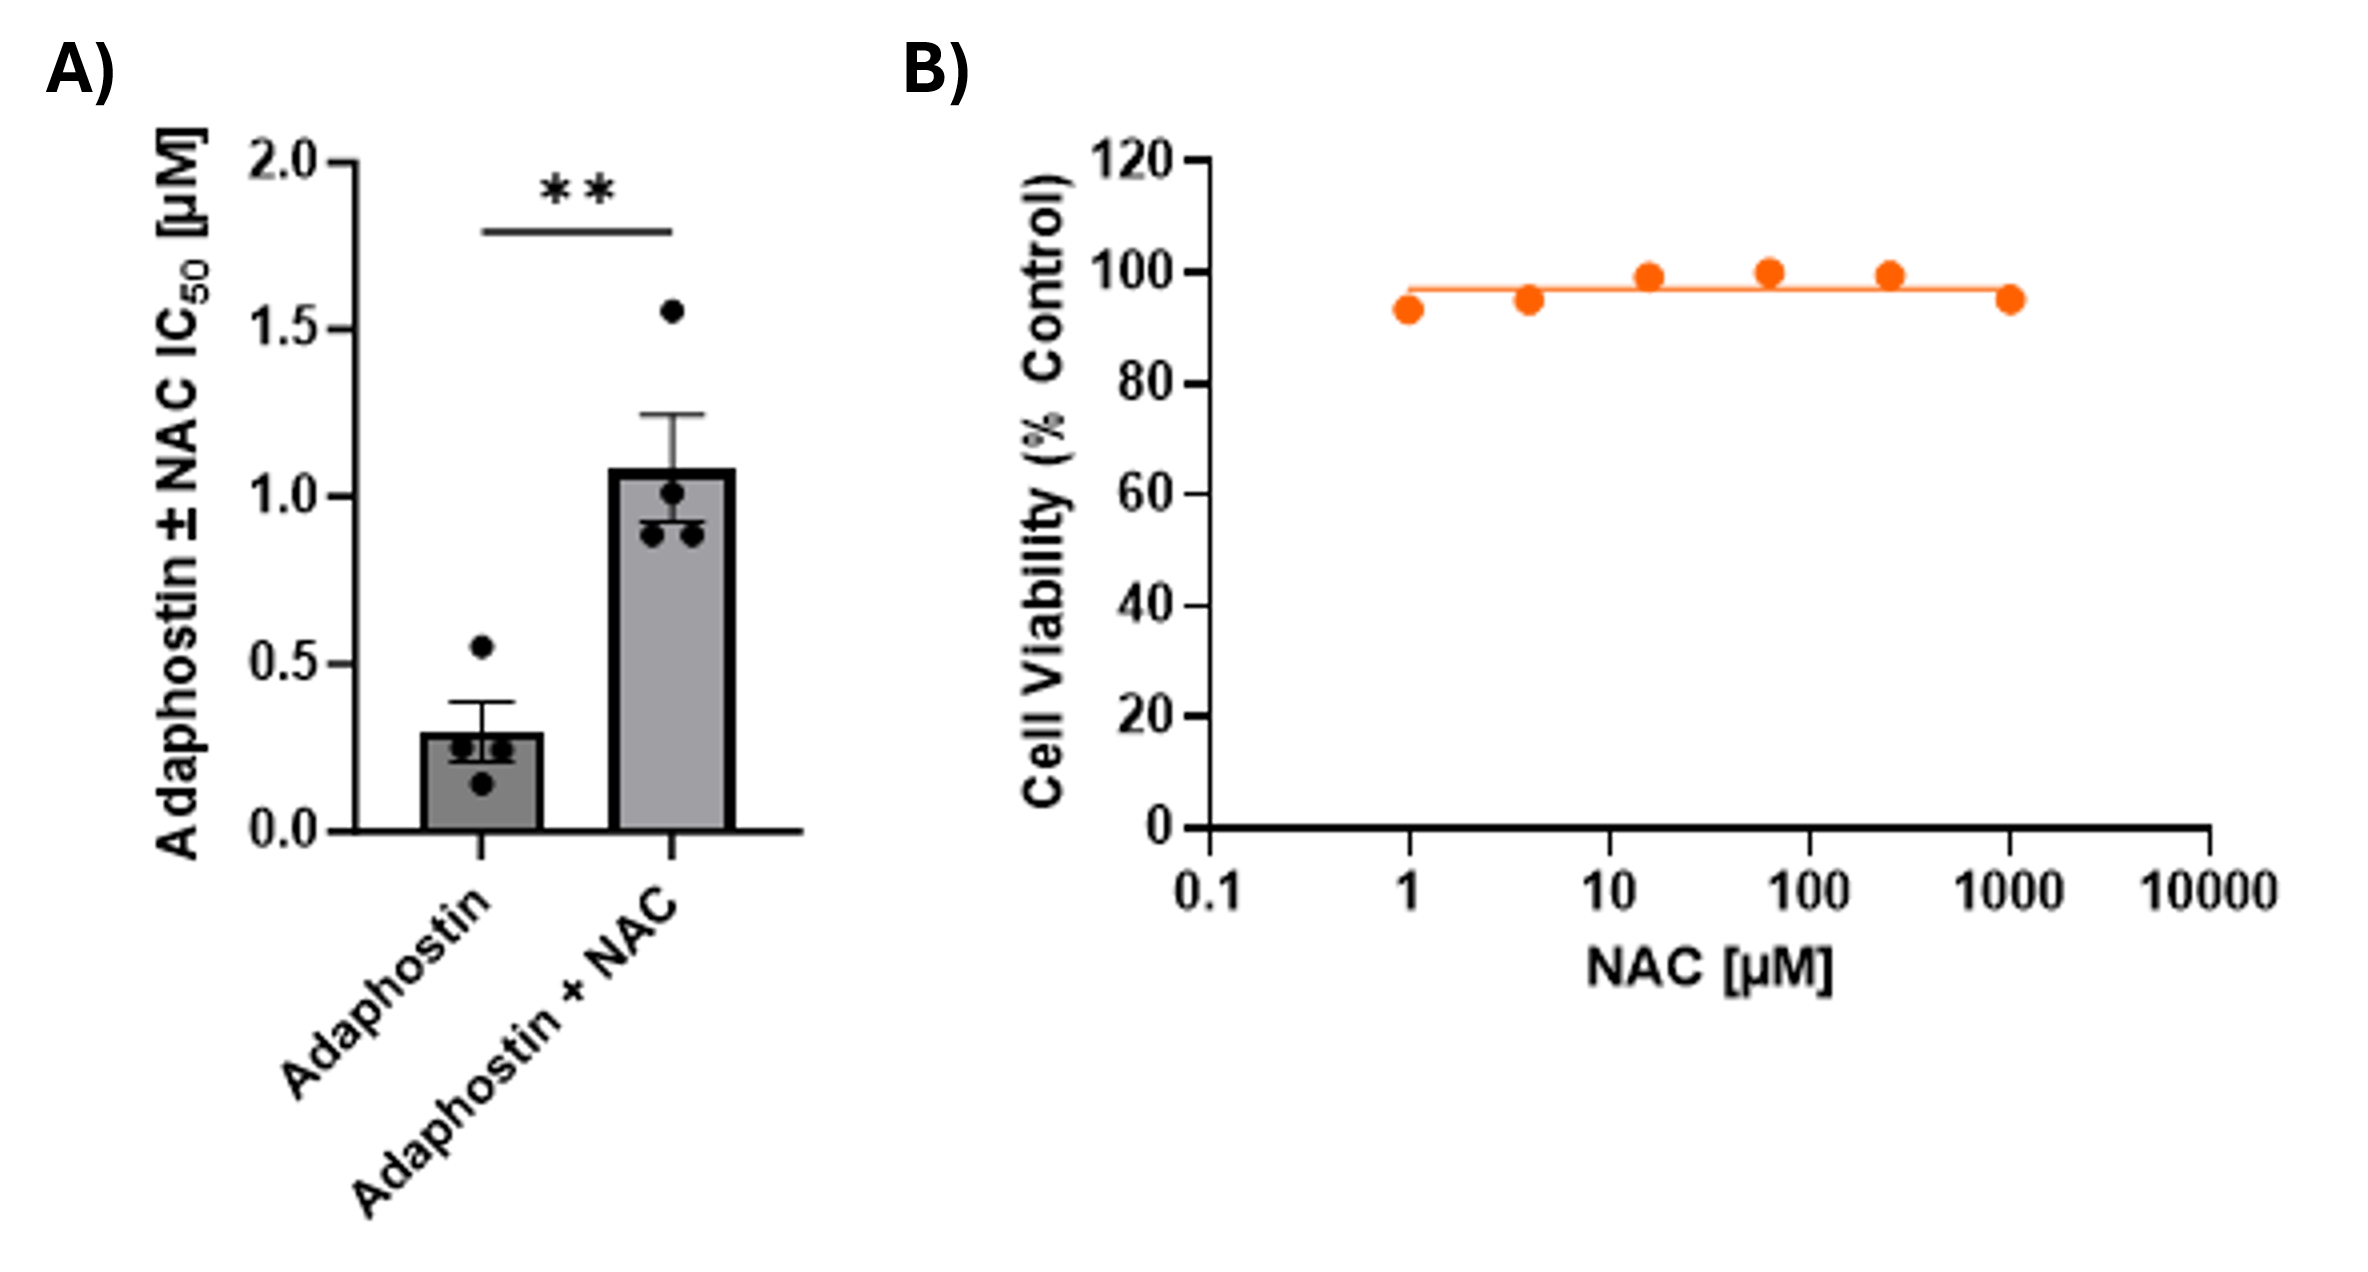
Figure S5. **Effect of NAC on adaphostin treatment of UWG01CTCs**. **A)** Bar graphs showingIC50 values obtained for UWG01CTCs treated with adaphostin alone versus adaphostin + 1 mM NAC.Values shown are means ± SD of 4 separate experiments each performed in triplicate. Unpaired T test with Welch’s correction, ** P=0.0088. **B)** Representative dose response curve of the UWG01CTCs treated with NAC for 72 h. Values shown are mean ± SEM, n= 3.


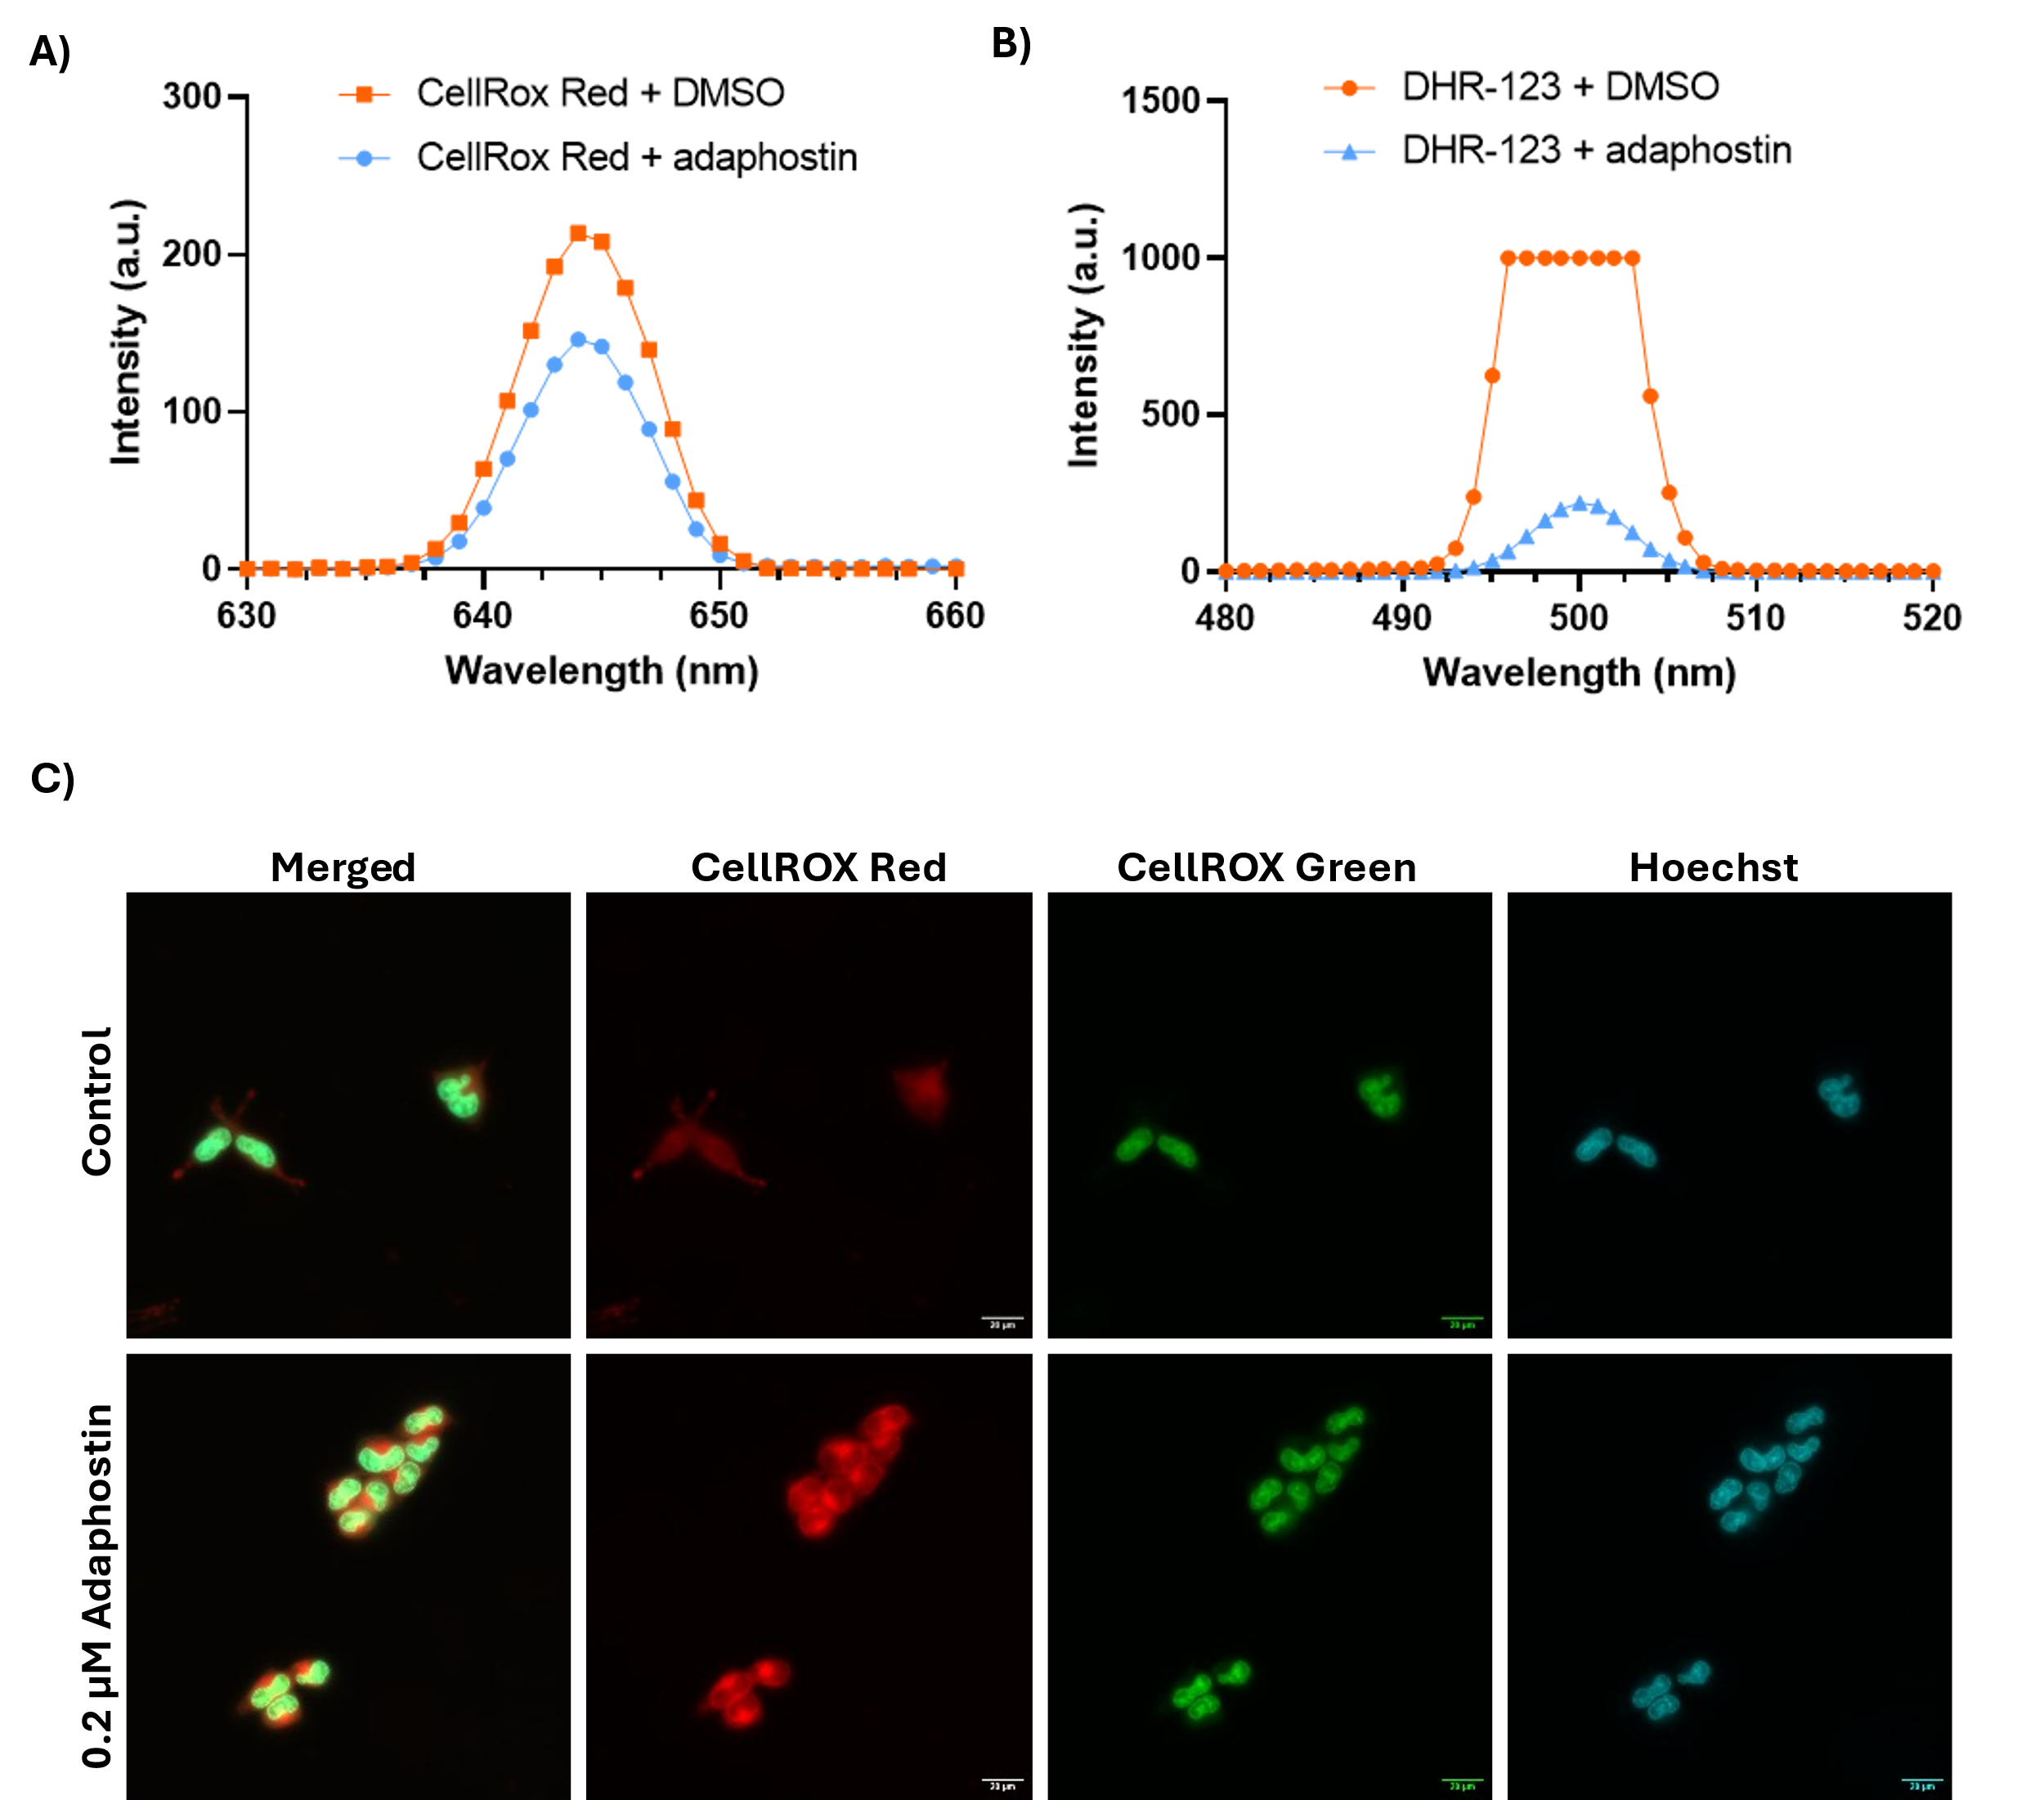


Figure S6. **Fluorometric analysis using ROS dyes**. **A,B)** Fluorescence intensity of PBS samples containing either **A)** 2.5 µM CellRox Deep Red (ThermoFisher Scientific) + 5 µM adaphostin or DMSO vehicle control, and **B)** 1 µM Dihydrorhodamine 123 (DHR 123; ThermoFisher Scientific) + 10 µM adaphostin or DMSO vehicle control, measured using the Cary Eclipse Fluorescence Spectrophotometer (Agilent Technologies). The reduction in fluorescence intensity of the ROS dyes CellRox Deep Red and, in particular, DHR-123 in the presence of high concentrations of adaphostin confirmed the quenching ability of the drug. **C)** Representative fluorescent images of UWG01CTCs exposed to 0.1% DMSO vehicle control (top row) or 0.2 µM adaphostin (bottom row) treatment for 1 h under low O2 (3%) conditions. Following treatment, the cells were washed with PBS and then incubated for 30 min with CellROX Deep Red (cytoplasmic ROS) + CellROX Green (nuclear and mitochondrial DNA) + Hoechst 33342 (nuclear DNA). Cells were then washed with Hanks buffered salt solution and imaged at 63x using a DMi8 inverted light microscope (Leica). Images show increased fluorescence intensity for cytoplasmic ROS (CellRox Deep Red staining) in adaphostin treated cells compared to vehicle control cells.
